# Supplementary material for: Determinants of Vaccination and Willingness to Vaccinate against COVID-19 among Pregnant and Postpartum Women during the Third Wave of the Pandemic: A European Multinational Cross-Sectional Survey
Source: MDPI journal article supplement (doi:10.3390/v15051090), 2023-04-29
Supplement: s1 [file s1]

## Supplementary Materials

**Supplementary Material S1:** English version of the survey relevant to this manuscript

**Supplementary Material S2:** Recruitment tools utilized and internet penetration rates

**Supplementary Material S3:** Rollout of vaccination against COVID in pregnant women and vaccination rates in the adult population in the five participating countries as of July 1<sup>st</sup>, 2021

**Supplementary Material S4:** Context of pandemic and rollout of vaccination against COVID in pregnant women in the five participating countries as of July 1<sup>st</sup>, 2021

**Supplementary Table S1:** Characteristics of the pregnant and postpartum women participating in the survey, but excluded because they did not answer the question on vaccination status

**Supplementary Table S2:** Association between socio-demographic, medical, obstetrical and ideological characteristics, and COVID-19 vaccination or willingness to get vaccinated among pregnant and postpartum women

**Supplementary Table S3:** Association between socio-demographic, medical, obstetrical and ideological characteristics, and COVID-19 vaccine willingness, whatever the vaccination status, among pregnant women

**Supplementary Table S4:** Association between socio-demographic, history of COVID-19, medical and obstetrical characteristics, and COVID-19 vaccination or willingness to get vaccinated among breastfeeding women

**Supplementary Table S5:** Specific reasons to believe that COVID vaccines are not effective and/or not safe among pregnant and postpartum women, stratified by breastfeeding

**Supplementary Figure S1:** Perceptions on the safety and effectiveness of conventional and COVID-19 vaccines among pregnant and postpartum women, vaccinated or willing to get vaccinated or not.

**Supplementary Figure S2:** Sources trusted to provide information regarding the coronavirus by obstetrical status and by country

**Supplementary Figure S3:** Hierarchical cluster analysis of determinants associated with vaccination adherence among pregnant and postpartum women

**Supplementary Material S1:** English version of the questionnaire relevant to this manuscript.

Did you participate in the previous COVID-survey distributed in June-July 2020?

a. Yes / b. No / c. I don't know

**A. Pregnancy-specific questionnaire**

- How many weeks pregnant are you right now? (dropdown menu: 0-42)
- Was the pregnancy planned?  
a. Yes / b. No / c. No, but it was not unexpected
- Have you been pregnant before?  
a. Yes / b. No
- If yes to previous question: How many children do you already have? (not including the current pregnancy)

**B. Postpartum-specific questionnaire**

Are you currently breastfeeding and/or giving expressed milk?

a. Yes / b. No

**C. Coronavirus infection (pregnancy and postpartum questionnaires)**

- Did you have a positive test for coronavirus infection?  
a. Yes / b. No
- If no to previous question: Do you believe you were infected with the coronavirus although not confirmed by a test?  
a. Yes / b. No
- Has any member(s) of your household or close family tested positive for the coronavirus since the start of the pandemic?  
a. Yes / b. No

**D. Covid-19 and disease severity (pregnancy and postpartum questionnaires)**

- If yes to previous questions on personal COVID infection: Can you specify the severity of the COVID-19 disease that affected you (multiple answers possible):
  - a. I have/ had no or mild symptoms
  - b. I have/ had moderate symptoms
  - c. I have/ had long-term symptoms of the disease
  - d. I was hospitalized but not in intensive care unit (ICU)
  - e. I was hospitalized in ICU
- If yes to previous question on familial COVID infection: Please indicate which applies regarding the severity of COVID-19 among the member(s) of your household / close family (multiple answers possible):
  - a. passed away
  - b. hospitalized in intensive care unit (ICU)
  - c. hospitalized but not in ICU
  - d. long-term symptoms of the disease
  - e. mild to no symptoms
  - f. moderate symptoms

**E. Covid-19 and pregnancy (pregnancy questionnaire)**

- Do you believe coronavirus infection can be more severe during pregnancy than among non-pregnant women of the same age?
  - a. Yes / b. No
- If yes to previous question: can you specify why you believe a coronavirus infection can be more severe during pregnancy (multiple answers possible):
  - a. I believe pregnant women are at increased risk of more severe disease with coronavirus infection (for example intensive care unit admission) due to the underlying pregnancy state
  - b. I believe coronavirus infection during pregnancy can cause malformations to the unborn child
  - c. I believe coronavirus infection during pregnancy can affect the growth and development of the unborn child
  - d. I believe coronavirus infection during pregnancy increases the risk of pregnancy complications (for example preterm birth)
  - e. I believe coronavirus infection could be transmitted to my baby during delivery
  - f. Other reason: ....

#### **F. COVID-19 and breastfeeding (postpartum questionnaire)**

- To what extent do you believe that breastfeeding can be risky for the nursing infant if a breastfeeding mother is infected with coronavirus?
  - a. Extremely risky
  - b. Very risky
  - c. Risky
  - d. Not very risky
  - e. Not risky at all
- If a, b or c to previous question: Can you specify why you believe that breastfeeding can be risky for the nursing infant if a breastfeeding mother is infected with the coronavirus (multiple answers possible):
  - a. I believe the virus can be transmitted to the baby through milk
  - b. I believe the baby could be infected while breastfeeding (through close contact)
  - c. I believe the disease could stop the mother from breastfeeding (feeling too sick)
  - d. I believe the disease could negatively affect the milk production
  - e. Other

#### **G. Coronavirus and restrictive measures (pregnancy and postpartum questionnaires)**

Please rate, on a scale from 1 to 5, how useful you believe the following measures are to prevent coronavirus transmission (1= Not at all useful, 2= Not very useful, 3= Useful, 4= Very useful, 5= Extremely useful):

- a. Using disinfectant gel/hand washing regularly
- b. Wearing masks
- c. Keeping a social distance
- d. Working from home
- e. Curfew
- f. A (semi-) Lockdown
- g. Vaccination

#### **H. Use of vaccines**

##### **Conventional vaccines perception (pregnancy and postpartum questionnaires)**

- To which extent do you believe conventional vaccines are **safe in the general population**?
  - a. Extremely safe
  - b. Very safe
  - c. Safe
  - d. Not very safe
  - e. Not safe at all
- To which extent do you believe conventional vaccines are **effective in the general population**?

- a. Extremely effective
- b. Very effective
- c. Effective
- d. Not very effective
- e. Not effective at all

#### **Conventional pregnancy vaccines perception (Pregnancy questionnaire)**

- To which extent do you believe vaccines that are recommended **during pregnancy are safe** for yourself and your unborn child (influenza, pertussis)?
  - a. Extremely safe
  - b. Very safe
  - c. Safe
  - d. Not very safe
  - e. Not safe at all
- To which extent do you believe vaccines that are recommended **during pregnancy are effective** to protect yourself and your unborn child (influenza, pertussis)?
  - a. Extremely effective
  - b. Very effective
  - c. Effective
  - d. Not very effective
  - e. Not effective at all

#### **Conventional vaccines perception (Postpartum questionnaire)**

To which extent do you believe conventional vaccines during breastfeeding **are safe** for the mother and her nursing infant?

- a. Extremely safe
- b. Very safe
- c. Safe
- d. Not very safe
- e. Not safe at all

#### **Flu vaccination (pregnancy and postpartum questionnaires)**

- Did you get a flu vaccination last winter (2020-2021)?
  - a. Yes / b. No
- If no to previous question: Why did you not get a flu vaccination last winter (2020-2021)? (multiple answers possible)
  - a. It was not suggested by a healthcare professional
  - b. I was unsure whether it was safe for my unborn child
  - c. I thought that I didn't need it as a pregnant woman
  - d. I generally refuse getting vaccines
  - e. I was advised by a friend/family member/ close relation not to do it
  - f. Other reason: ....
- If yes to breastfeeding: Have you already been vaccinated against coronavirus?
  - a. Yes / b. No
- If no to previous question: Indicate which applies to you: "I would get vaccinated against coronavirus while breastfeeding if I had the opportunity."
  - a. Yes / b. No / c. I don't know
- If no to breastfeeding: Have you already been vaccinated against coronavirus?
  - a. Yes / b. No

- If no to previous question: Indicate which applies to you: “I would get vaccinated against coronavirus if I had the opportunity.”
  - a. Yes / b. No / c. I don’t know

#### **Covid-19 vaccine perception (pregnancy and postpartum questionnaires)**

- To which extent do you believe COVID-19 vaccines are **effective** to protect the general population?
  - a. Extremely effective
  - b. Very effective
  - c. Effective
  - d. Not very effective
  - e. Not effective at all
- To which extent do you believe COVID-19 vaccines are **safe** in the general population?
  - a. Extremely safe
  - b. Very safe
  - c. Safe
  - d. Not very safe
  - e. Not safe at all

#### **Covid-19 vaccine perception (Pregnancy questionnaire)**

- To which extent do you believe COVID-19 vaccines are **effective** to protect yourself and your unborn child during pregnancy?
  - a. Extremely effective
  - b. Very effective
  - c. Effective
  - d. Not very effective
  - e. Not effective at all
- To which extent do you believe COVID-19 vaccines are **safe** for yourself and your unborn child during pregnancy?
  - a. Extremely safe
  - b. Very safe
  - c. Safe
  - d. Not very safe
  - e. Not safe at all
- If answers c, d or e to previous question then: Please select the reason(s) you believe COVID-19 vaccines are not (entirely) **safe during pregnancy** (multiple answers possible):
  - a. I believe that it bears potential risks for my own health
  - b. I believe that it bears a potential risk of malformation for my unborn child
  - c. I believe that it bears a potential risk for my unborn child’s growth and development
  - d. I believe that I could catch the disease through the vaccine
  - e. I believe that it could cause DNA alterations
  - f. I believe that it could negatively affect my fertility
  - g. I believe that it could lead to a miscarriage or stillbirth
  - h. I believe that some steps of the usual process of vaccine development and approval were not fully completed or bypassed
  - i. I believe that the long-term effects of these vaccines are not known yet
  - j. I believe that other medical treatments for COVID-19 may be safer
  - k. I believe that other non-medical treatments for COVID-19 may be safer
  - l. I generally don’t believe vaccines are safe
  - m. Other

#### **Covid-19 vaccine perception (Postpartum questionnaire)**

- If answer yes to breastfeeding: To which extent do you believe COVID-19 vaccines are **effective** to protect yourself and your child while breastfeeding?

- a. Extremely effective
  - b. Very effective
  - c. Effective
  - d. Not very effective
  - e. Not effective at all
- If answer no to breastfeeding: To which extent do you believe COVID-19 vaccines are **effective** to protect yourself?
  - a. Extremely effective
  - b. Very effective
  - c. Effective
  - d. Not very effective
  - e. Not effective at all
- If answer yes to breastfeeding: To which extent do you believe COVID-19 vaccines are **safe for yourself and your child** while breastfeeding?
  - a. Extremely safe
  - b. Very safe
  - c. Safe
  - d. Not very safe
  - e. Not safe at all
- If answers c, d or e to previous question then: Please select the reason(s) you believe that COVID-19 vaccines are not (entirely) safe **during breastfeeding** (multiple answers possible).
  - a. I believe that it bears potential risks for my own health
  - b. I believe that it bears potential risks for my nursing infant
  - c. I believe that I could catch/transmit the disease through the vaccine
  - d. I believe that it could cause DNA alterations
  - e. I believe that it could negatively affect my fertility
  - f. I believe that some steps of the usual process of vaccine development and approval were not fully completed or bypassed
  - g. I believe that the long-term effects of these vaccines are not known yet
  - h. I believe that other medical treatments for COVID-19 may be more safe
  - i. I believe that other non-medical treatments for COVID-19 may be more safe
  - j. I generally don't believe vaccines are safe
  - k. Other
- If answer no to breastfeeding: To which extent do you believe COVID-19 vaccines are **safe for yourself**?
  - a. Extremely safe
  - b. Very safe
  - c. Safe
  - d. Not very safe
  - e. Not safe at all
- If answers c, d or e to previous question then: Please select the reason(s) you believe that COVID-19 vaccines are not (entirely) safe (multiple answers possible):
  - a. I believe that it bears potential risks for my own health
  - b. I believe that I could catch the disease through the vaccine
  - c. I believe that it could cause DNA alterations
  - d. I believe that it could negatively affect my fertility
  - e. I believe that some steps of the usual process of vaccine development and approval were not fully completed or bypassed
  - f. I believe that the long-term effects of these vaccines are not known yet
  - g. I believe that other medical treatments for COVID-19 may be more safe
  - h. I believe that other non-medical treatments for COVID-19 may be more safe
  - i. I generally don't believe vaccines are safe

j. Other

**Influence of family / friends (pregnancy and postpartum questionnaires) #**

- Has any member of your family or close relation refused a COVID-19 vaccination?  
a. Yes / b. No
- If yes to previous question: Has his/her decision to refuse a COVID-19 vaccine contributed to your perception of COVID-19 vaccination?  
a. Yes / b. No
- Have you already been vaccinated against coronavirus?  
a. Yes / b. No
- If answer no to previous question: Indicate which applies to you: "I would get vaccinated against coronavirus during pregnancy if I had the opportunity."  
a. Yes / b. No / c. I don't know

**Use of medicines (pregnancy and postpartum questionnaires) #**

- Did you use any medication(s) in the past 3 months?  
a. Yes / b. No
- If answer yes to previous question: Please indicate for which chronic illnesses you have used a medication in the past 3 months? (i.e., chronic illnesses are conditions that already existed before your pregnancy) (multiple answers possible)?
  - a. Asthma
  - b. Allergy
  - c. Cardiovascular disease (including high blood pressure, high cholesterol, heart disease, etc.)
  - d. Depression
  - e. Diabetes
  - f. Epilepsy
  - g. Hypothyroidism (underactive thyroid)
  - h. Rheumatic diseases (including rheumatoid arthritis, psoriatic arthritis, etc.)
  - i. Inflammatory bowel disease (including Crohn's disease, Ulcerative colitis, etc.)
  - j. Anxiety
  - k. Other: ....
  - l. None

**Coronavirus and information sources (pregnancy and postpartum questionnaires) #**

Please rate how much you trust the following sources of information to provide reliable information regarding the coronavirus (0= Distrust, 1= Very little trust, 2= Little trust, 3= Moderate trust, 4= Great trust, 5= Absolute trust):

- a. The government
- b. Health authorities
- c. General physician
- d. Obstetrician
- e. Midwife
- f. Pharmacist
- g. My family /friends
- h. The media (newspapers, TV news channels etc.)
- i. The internet

**Personal background (pregnancy and postpartum questionnaires) #**

- Year of birth? (Dropdown menu)
- Do you currently have a partner?

- a. Yes / b. No
- Have you smoked since you found out you were pregnant?
  - a. Yes / b. No
- What is your highest level of education?
  - a. Primary education
  - b. Professional secondary education
  - c. Technical secondary education
  - d. Artistic secondary education
  - e. General secondary education
  - f. Professional bachelor
  - g. Academic bachelor
  - h. Master
  - i. PhD
  - j. Other: .....
- What is your current professional status? (if you are currently not working because of pregnancy complications or maternity leave, please fill in the professional status you had before)
  - a. Employee
  - b. Self-employed
  - c. Civil service employee
  - d. Student
  - e. Homemaker
  - f. Jobseeker/unemployed
  - g. Incapacitated/disabled
  - h. Other
- If answer a,b,c,d or h then: Are/were you working/ following an education in healthcare?
- If answer a,b,c or h then: Does your employment put you at increased risk of catching COVID-19 ?

**Legend:**

# The patients excluded from the analysis did not answers the questions including in the sections "Influence of family / friends", "Use of medicines", "Coronavirus and information sources" and "Personal background" which are located at the end of the questionnaire



**Supplementary Material S2:** Recruitment tools utilized and internet penetration rates

| <i>Country</i>  | <i>Websites used for recruitment</i>                                                                                                                                                                           | <i>Internet penetration rates (%)</i> |
|-----------------|----------------------------------------------------------------------------------------------------------------------------------------------------------------------------------------------------------------|---------------------------------------|
| Norway          | www.altformamma.no (i.e. pregnancy website); several Facebook sites (e.g. Facebook: Gravid i coronatider); pregnancy forums (e.g. Facebook: Termin september 2020); mobile application (Helseappen).           | 99.0 <sup>1</sup>                     |
| Belgium         | www.gezondzwangerworden.be; several Facebook pages and websites of perinatal organizations, midwives, lactation consultants, community pharmacies,...                                                          | 96.0 <sup>2</sup>                     |
| Switzerland     | www.chuv.ch; www.swissmom.ch; several Facebook pages;                                                                                                                                                          | 95.0 <sup>3</sup>                     |
| The Netherlands | www.consumentenbond.nl; www.24baby.nl; several Facebook sites (e.g. ik ben zwanger, kindje klein); website for midwives (www.deverloskundige.nl); Lareb website (www.lareb.nl and www.lareb.nl/tis-knowledge). | 94.2 <sup>4</sup>                     |
| UK              | www.medicinesinpregnancy.org (i.e. the UKTIS patient facing website); Twitter (UKTIS account); Facebook (local maternity/mother and baby groups).                                                              | 99.3 <sup>5</sup>                     |

Sources of internet penetration rates: <sup>1</sup> Statistics Norway (<https://www.ssb.no/en>); <sup>2</sup> Statistics Flanders, Belgium ([www.statistiekvlaanderen.be](http://www.statistiekvlaanderen.be)); <sup>3</sup> Statistics Switzerland ([www.bfs.admin.ch](http://www.bfs.admin.ch)); <sup>4</sup> Statistics Netherlands ([www.statistika.com](http://www.statistika.com)); <sup>5</sup> Statistics UK (<https://www.ons.gov.uk>)

| Country         | Data Collection period (2021)                    | Recommendations for vaccination in pregnant women with corresponding start dates                                                                                                                                                                                                                                                                                                                                                                                                                             | Percentage of the population over 18 years (1 dose/ 2 doses) as of July 1 <sup>st</sup> 2021 |
|-----------------|--------------------------------------------------|--------------------------------------------------------------------------------------------------------------------------------------------------------------------------------------------------------------------------------------------------------------------------------------------------------------------------------------------------------------------------------------------------------------------------------------------------------------------------------------------------------------|----------------------------------------------------------------------------------------------|
| Belgium         | June 10 <sup>th</sup> to July 18 <sup>th</sup>   | High risk of infection*: 21.01.2021<br>At-risk pregnancies: 21.01.2021<br>All pregnant women: 15.04.2021 (irrespective of trimester)<br>Booster dose: 16.12.2021<br>Breastfeeding: permitted on 21.01.2021                                                                                                                                                                                                                                                                                                   | 64% / 44%                                                                                    |
| Norway          | July 1 <sup>st</sup> to 24 <sup>th</sup>         | High risk of infection*: 29.04.2021<br>At-risk pregnancies: 18.08.2021<br>Pregnant women (preferably in the 2 <sup>nd</sup> /3 <sup>rd</sup> trimester, 1 <sup>st</sup> trimester for at-risk pregnant women): 18.08.2021<br>Booster dose: 19.01.2022<br>All pregnant women (irrespective of trimester): 31.01.2022<br>Breastfeeding: 25.03.2022                                                                                                                                                             | 51% / 29%                                                                                    |
| Switzerland     | June 14 <sup>th</sup> to August 22 <sup>nd</sup> | High risk of exposure: 14.04.21<br>At-risk pregnancies in 2 <sup>nd</sup> or 3 <sup>rd</sup> trimester: 14.04.21<br>All pregnant women from 12 weeks (possible in 1 <sup>st</sup> trimester): 14.09.21<br>Booster dose: 26.11.21<br>Breastfeeding: recommended 14.09.21                                                                                                                                                                                                                                      | 50% / 38%                                                                                    |
| The Netherlands | June 11 <sup>th</sup> to July 18 <sup>th</sup>   | High risk of exposure: 08.01.2021<br>Comorbidities**: 08.01.2021 (strongly recommended)<br>All pregnant women: 22.04.2021 (should be vaccinated routinely, when they qualify according to the national vaccination strategy; 2 <sup>nd</sup> and 3 <sup>rd</sup> trimesters preferred)<br>Booster dose: 17.12.2021<br>Breastfeeding: permitted                                                                                                                                                               | 72% / 41%                                                                                    |
| United Kingdom  | June 14 <sup>th</sup> to July 30 <sup>th</sup>   | High risk of exposure*: 30.12.2020<br>Comorbidities: 30.12.2020<br>All pregnant women: 16.04.2021 <ul style="list-style-type: none"> <li>- offered to all pregnant women at the same time as the rest of the population based on their age and clinical risk group</li> <li>- vaccination preferred before 3<sup>rd</sup> trimester</li> <li>- Pregnant women would be placed on the priority list for vaccination: 16.12.2021</li> </ul> Booster dose: 16.12.2021<br>Breastfeeding: permitted on 30.12.2020 | 85% / 63%                                                                                    |

**Supplementary Material S3:** Rollout of vaccination against COVID in pregnant women and vaccination rates in the adult population in the five participating countries as of July 1<sup>st</sup>, 2021

\* healthcare professionals with a high risk of exposure to SARS-CoV-2

\*\* These illnesses include: chronic airway or lung problems who are under treatment, chronic heart patients who are therefore eligible for a flu shot, diabetes who are poorly adjusted and / or with complications, kidney disease requiring dialysis or waiting for one kidney transplant, reduced resistance to infections because of taking medicines for an autoimmune disease and women who have undergone an organ- or stem cell transplantation, blood disorder, reduced resistance because they take immune suppressive medication. Cancer patients during or within three months after chemotherapy and / or radiation, severe immune disorders for which they need treatment from a doctor. Women who don't have a spleen, or a not functioning spleen, human immunodeficiency virus infection, severe liver disease, very seriously overweight women, maternal age over 35 years and/or with migration background.

**Supplementary Material S4:** Context of pandemic and rollout of vaccination against COVID in general population in the five participating countries as of July 1<sup>st</sup>, 2021

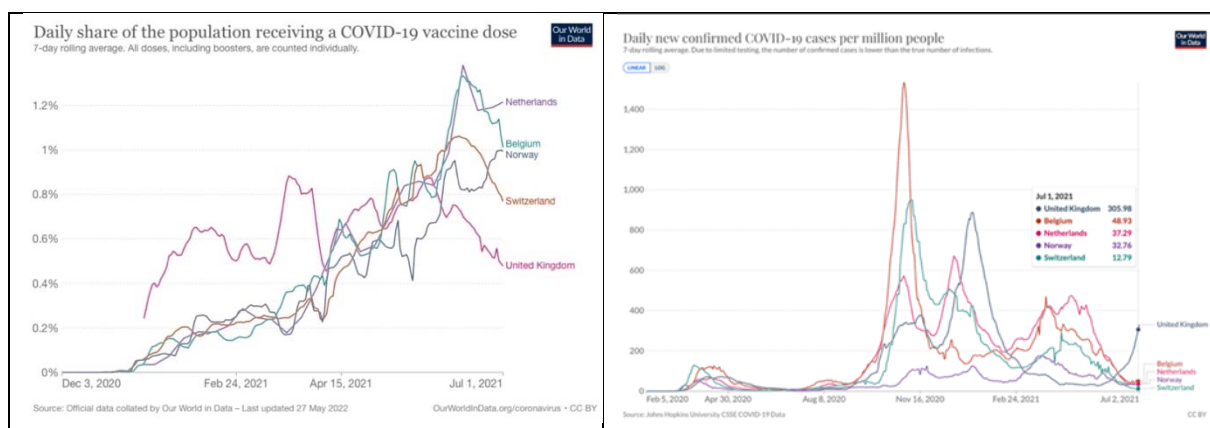

These plots are extracted from the website “Our world in Data” available at <https://ourworldindata.org/coronavirus>

**Supplementary Table S1:** Characteristics of the pregnant and postpartum women participating in the survey, but excluded because they did not answer the question on vaccination status

| Characteristics                          |                           | Pregnant women who did not answer to vaccination status<br>N=216<br>N (%) | Postpartum women who did not answer to vaccination status<br>N=140<br>N (%) |
|------------------------------------------|---------------------------|---------------------------------------------------------------------------|-----------------------------------------------------------------------------|
| Country                                  | Belgium                   | 62 (28.7)                                                                 | 39 (27.9)                                                                   |
|                                          | Norway                    | 0 (0)                                                                     | 0 (0)                                                                       |
|                                          | Switzerland               | 45 (20.8)                                                                 | 36 (25.7)                                                                   |
|                                          | Netherlands               | 52 (24.1)                                                                 | 31 (22.1)                                                                   |
|                                          | United Kingdom            | 57 (26.4)                                                                 | 34 (24.3)                                                                   |
|                                          |                           |                                                                           |                                                                             |
| Maternal age #                           | 18-25                     | 0 (0)                                                                     | 0 (0)                                                                       |
|                                          | 26-30                     | 0 (0)                                                                     | 0 (0)                                                                       |
|                                          | 31-35                     | 0 (0)                                                                     | 0 (0)                                                                       |
|                                          | 36-40                     | 0 (0)                                                                     | 0 (0)                                                                       |
|                                          | >40                       | 0 (0)                                                                     | 0 (0)                                                                       |
|                                          | Missing data              | 216 (100)                                                                 | 140 (100)                                                                   |
| Relationship Status #                    | Partner                   | 0 (0)                                                                     | 0 (0)                                                                       |
|                                          | No partner                | 0 (0)                                                                     | 0 (0)                                                                       |
|                                          | Missing data              | 216 (100)                                                                 | 140 (100)                                                                   |
| Professional status * #                  | Inactive                  | 0 (0)                                                                     | 0 (0)                                                                       |
|                                          | Active                    | 0 (0)                                                                     | 0 (0)                                                                       |
|                                          | Missing data              | 216 (100)                                                                 | 140 (100)                                                                   |
| Working in Healthcare #                  | No                        | 0 (0)                                                                     | 0 (0)                                                                       |
|                                          | Yes                       | 0 (0)                                                                     | 0 (0)                                                                       |
|                                          | Missing data              | 216 (100)                                                                 | 140 (100)                                                                   |
| Educational Level #                      | Low                       | 0 (0)                                                                     | 0 (0)                                                                       |
|                                          | Medium                    | 0 (0)                                                                     | 0 (0)                                                                       |
|                                          | High                      | 0 (0)                                                                     | 0 (0)                                                                       |
|                                          | Missing data              | 216 (100)                                                                 | 140 (100)                                                                   |
| Smoking during pregnancy ** #            | Yes                       | 0 (0)                                                                     | 0 (0)                                                                       |
|                                          | No                        | 0 (0)                                                                     | 0 (0)                                                                       |
|                                          | Missing data              | 216 (100)                                                                 | 140 (100)                                                                   |
| History of positive SARS-CoV-2 test      | Yes                       | 21 (9.7) ***                                                              | 17 (12.1) ***                                                               |
|                                          | No                        | 129 (59.7)                                                                | 84 (60.0)                                                                   |
|                                          | Missing data              | 66 (30.6)                                                                 | 39 (27.9)                                                                   |
| Chronic illness requiring medication #   | Yes                       | 0 (0)                                                                     | 0 (0)                                                                       |
|                                          | No                        | 0 (0)                                                                     | 0 (0)                                                                       |
|                                          | Missing data              | 216 (100)                                                                 | 140 (100)                                                                   |
| Gravidity                                | Primigravida              | 80 (37.0)                                                                 | NA                                                                          |
|                                          | Multigravida              | 71 (32.9)                                                                 | NA                                                                          |
|                                          | Missing data              | 65 (30.1)                                                                 | NA                                                                          |
| Gestational trimester                    | 1 <sup>st</sup> trimester | 41 (19.0) ***                                                             | NA                                                                          |
|                                          | 2 <sup>nd</sup> trimester | 49 (22.7) ***                                                             | NA                                                                          |
|                                          | 3 <sup>rd</sup> trimester | 61 (28.2) ***                                                             | NA                                                                          |
|                                          | Missing data              | 65 (30.1)                                                                 | NA                                                                          |
| Breastfeeding                            | Yes                       | NA                                                                        | 81 (57.9) ***                                                               |
|                                          | No                        | NA                                                                        | 36 (25.7)                                                                   |
|                                          | Missing data              | NA                                                                        | 23 (16.4)                                                                   |
| Participated in the COVID survey in 2020 | Yes                       | 3 (1.4)                                                                   | 3 (2.1)                                                                     |
|                                          | No                        | 152 (70.4)                                                                | 126 (90.0)                                                                  |
|                                          | Do not know               | 5 (2.3)                                                                   | 11 (7.9)                                                                    |

|  |                     |           |       |
|--|---------------------|-----------|-------|
|  | <i>Missing data</i> | 56 (25.9) | 0 (0) |
|--|---------------------|-----------|-------|

Results are expressed as absolute numbers (%). NA = question was not applicable.

\* At the time of survey completion or before maternity leave. \*\* Smoking during current/previous pregnancy for pregnant and post-partum, respectively.

# The question was asked after the question on vaccination status. When considering the order of the questions in both surveys, women who did not answer about their vaccination status had a missing response rate of 30% and they stopped the survey completely from the question "Has any member of your family or close relation refused COVID-19 vaccination?", which stands two questions before the one on vaccination status. They therefore did not answer all the following questions, including those concerning their basic socio-professional characteristics, which did not allow for a more detailed comparative analysis of their characteristics.

\*\*\* These characteristics are different from the characteristics from the women included in the study by performing Chi<sup>2</sup> tests (p<0.01).

**Supplementary Table S2:** Association between socio-demographic, medical, obstetrical and ideological characteristics, and COVID-19 vaccination or willingness to get vaccinated among pregnant and postpartum women

|                                   | Pregnant women with available vaccination status<br>N=3194 |                                                            |                         |                           | Postpartum women with available vaccination status<br>N=1659 |                                                            |                         |                           |
|-----------------------------------|------------------------------------------------------------|------------------------------------------------------------|-------------------------|---------------------------|--------------------------------------------------------------|------------------------------------------------------------|-------------------------|---------------------------|
| Determinants                      | Not willing to get vaccinated<br>N=2131<br>N (%)           | Vaccinated or willing to get vaccinated<br>N=1063<br>N (%) | OR (95% CI)             | aOR <sub>1</sub> (95% CI) | Not willing to get vaccinated<br>N=343<br>N (%)              | Vaccinated or willing to get vaccinated<br>N=1316<br>N (%) | OR (95% CI)             | aOR <sub>2</sub> (95% CI) |
| SOCIO-DEMOGRAPHIC CHARACTERISTICS |                                                            |                                                            |                         |                           |                                                              |                                                            |                         |                           |
| <b>Country</b>                    |                                                            |                                                            |                         |                           |                                                              |                                                            |                         |                           |
| Belgium                           | 58 (2.7)                                                   | 240 (22.6)                                                 | <b>15.1 (11.3-20.7)</b> | <b>63.5 (32.3-131.8)</b>  | 28 (8.2)                                                     | 168 (12.8)                                                 | 1.20 (0.93-2.19)        | <b>3.24 (1.22-9.81)</b>   |
| Norway                            | 1866 (87.6)                                                | 510 (48.0)                                                 | <b>Ref</b>              | <b>Ref</b>                | 211 (61.5)                                                   | 902 (68.5)                                                 | <b>Ref</b>              | <b>Ref</b>                |
| Switzerland                       | 112 (5.3)                                                  | 53 (5.0)                                                   | <b>1.73 (1.22-2.42)</b> | <b>4.01 (2.24-7.32)</b>   | 58 (16.9)                                                    | 82 (6.2)                                                   | <b>0.33 (0.23-0.48)</b> | 0.78 (0.35-1.82)          |
| Netherlands                       | 46 (2.2)                                                   | 77 (7.2)                                                   | <b>6.12 (4.21-9.00)</b> | <b>27.6 (12.8-62.8)</b>   | 34 (9.9)                                                     | 90 (6.8)                                                   | <b>0.62 (0.41-0.96)</b> | <b>7.51 (2.63-23.4)</b>   |
| United Kingdom                    | 49 (2.3)                                                   | 183 (17.2)                                                 | <b>13.7 (9.90-19.2)</b> | <b>25.4 (13.3-51.0)</b>   | 12 (3.5)                                                     | 74 (5.6)                                                   | 1.44 (0.79-2.84)        | 1.37 (0.42-5.24)          |
| <b>Maternal age</b>               |                                                            |                                                            |                         |                           |                                                              |                                                            |                         |                           |
| 18-35                             | 1804 (85.4)                                                | 871 (84.0)                                                 | Ref                     | ⊥                         | 277 (83.9)                                                   | 1082 (84.1)                                                | Ref                     | ⊥                         |
| >35                               | 308 (14.6)                                                 | 166 (16.0)                                                 | 1.12 (0.91-1.37)        | ⊥                         | 53 (12.7)                                                    | 204 (15.9)                                                 | 0.99 (0.71-1.38)        | ⊥                         |
| <b>Working in healthcare</b>      |                                                            |                                                            |                         |                           |                                                              |                                                            |                         |                           |
| No                                | 1298 (70.5)                                                | 581 (61.6)                                                 | Ref                     | Ref                       | 200 (71.9)                                                   | 747 (64.7)                                                 | Ref                     | Ref                       |

|                                                                                                                    |             |             |                         |                  |            |             |                         |                  |
|--------------------------------------------------------------------------------------------------------------------|-------------|-------------|-------------------------|------------------|------------|-------------|-------------------------|------------------|
| Yes                                                                                                                | 544 (29.5)  | 362 (38.4)  | <b>1.49 (1.26-1.75)</b> | 1.24 (0.91-1.69) | 78 (28.1)  | 408 (35.3)  | <b>1.40 (1.05-1.88)</b> | 1.21 (0.71-2.10) |
| <b>Employment at risk of contracting COVID-19</b>                                                                  |             |             |                         |                  |            |             |                         |                  |
| No                                                                                                                 | 152 (53.1)  | 278 (54.6)  | Ref                     | ⊥                | 56 (50.5)  | 170 (44.2)  | Ref                     | ⊥                |
| Yes                                                                                                                | 134 (46.9)  | 231 (45.4)  | 0.94 (0.70-1.26)        | ⊥                | 55 (49.5)  | 215 (55.8)  | 1.29 (0.84-1.96)        | ⊥                |
| <b>Educational level</b>                                                                                           |             |             |                         |                  |            |             |                         |                  |
| Low                                                                                                                | 63 (3.0)    | 10 (1.0)    | Ref                     | Ref              | 10 (3.1)   | 24 (1.9)    | Ref                     | ⊥                |
| Medium                                                                                                             | 406 (19.4)  | 134 (12.9)  | <b>2.07 (1.08-4.41)</b> | 1.15 (0.30-5.33) | 91 (28.0)  | 199 (15.6)  | 0.91 (0.40-1.93)        | ⊥                |
| High                                                                                                               | 1625 (77.6) | 891 (86.1)  | <b>3.45 (1.85-7.19)</b> | 1.33 (0.36-5.89) | 224 (68.9) | 1055 (82.6) | 1.96 (0.88-4.05)        | ⊥                |
| <b>PERSONAL AND FAMILY HISTORY OF COVID-19</b>                                                                     |             |             |                         |                  |            |             |                         |                  |
| <b>History of personal positive SARS-CoV-2 test</b>                                                                |             |             |                         |                  |            |             |                         |                  |
| No                                                                                                                 | 2046 (96.0) | 1005 (94.6) | Ref                     | ⊥                | 317 (92.4) | 1259 (95.7) | <b>Ref</b>              | Ref              |
| Yes                                                                                                                | 85 (4.0)    | 57 (5.4)    | 1.37 (0.96-1.92)        | ⊥                | 26 (7.6)   | 57 (4.3)    | <b>0.55 (0.35-0.91)</b> | 0.57 (0.22-1.67) |
| <b>History of personal COVID infection (suspected or confirmed)</b>                                                |             |             |                         |                  |            |             |                         |                  |
| No                                                                                                                 | 1914 (89.8) | 933 (87.9)  | Ref                     | ⊥                | 270 (82.8) | 1114 (86.6) | Ref                     | ⊥                |
| Yes                                                                                                                | 217 (10.2)  | 129 (12.1)  | 1.22 (0.97-1.53)        | ⊥                | 56 (17.2)  | 173 (13.4)  | 0.75 (0.54-1.05)        | ⊥                |
| <b>History of positive SARS-CoV-2 test in household or close family</b>                                            |             |             |                         |                  |            |             |                         |                  |
| No                                                                                                                 | 1865 (87.5) | 851 (80.1)  | <b>Ref</b>              | Ref              | 268 (78.1) | 1072 (81.5) | Ref                     | ⊥                |
| Yes                                                                                                                | 266 (12.5)  | 212 (19.9)  | <b>1.75 (1.43-2.13)</b> | 0.95 (0.63-1.42) | 75 (21.9)  | 244 (18.5)  | 0.81 (0.61-1.09)        | ⊥                |
| <b>History of COVID-19 with hospitalization in ICU in household or close family among positive cases in family</b> |             |             |                         |                  |            |             |                         |                  |
| No                                                                                                                 | 111 (92.5)  | 53 (77.9)   | <b>Ref</b>              | *                | 58 (96.7)  | 82 (90.1)   | Ref                     | ⊥                |

|                                                             |             |            |                  |                  |                                                      |             |                  |                  |
|-------------------------------------------------------------|-------------|------------|------------------|------------------|------------------------------------------------------|-------------|------------------|------------------|
| Yes                                                         | 9 (7.5)     | 15 (22.1)  | 3.49 (1.46-8.80) |                  | 2 (3.3)                                              | 9 (9.9)     | 2.91 (0.97-16.8) | ⊥                |
| MEDICAL AND OBSTETRICAL CHARACTERISTICS                     |             |            |                  |                  |                                                      |             |                  |                  |
| Allergy requiring medication                                |             |            |                  |                  |                                                      |             |                  |                  |
| No                                                          | 909 (67.8)  | 507 (71.8) | Ref              | ⊥                | 164 (81.2)                                           | 626 (76.7)  | Ref              | ⊥                |
| Yes                                                         | 431 (32.2)  | 199 (28.2) | 0.83 (0.68-1.01) | ⊥                | 38 (18.8)                                            | 190 (23.3)  | 1.31 (0.90-1.95) | ⊥                |
| Chronic illness requiring medication                        |             |            |                  |                  |                                                      |             |                  |                  |
| No                                                          | 909 (66.7)  | 507 (62.2) | Ref              | Ref              | 164 (78.1)                                           | 626 (70.3)  | Ref              | Ref              |
| Yes                                                         | 453 (33.3)  | 423 (37.8) | 1.22 (1.02-1.46) | 1.47 (1.11-1.94) | 46 (21.9)                                            | 264 (29.7)  | 1.50 (1.06-2.17) | 2.16 (1.19-4.11) |
| Gravidity                                                   |             |            |                  |                  |                                                      |             |                  |                  |
| Multigravida                                                | 1052 (49.4) | 535 (50.3) | Ref              | ⊥                | NA                                                   | NA          |                  |                  |
| Primigravida                                                | 1079 (50.6) | 528 (49.7) | 0.96 (0.83-1.11) | ⊥                |                                                      |             |                  |                  |
| Trimester of pregnancy                                      |             |            |                  |                  |                                                      |             |                  |                  |
| 1 <sup>st</sup> trimester                                   | 185 (8.7)   | 166 (15.6) | Ref              | Ref              |                                                      |             |                  |                  |
| 2 <sup>nd</sup> trimester                                   | 674 (31.6)  | 428 (40.3) | 0.71 (0.56-0.90) | 0.75 (0.49-1.15) | NA                                                   | NA          |                  |                  |
| 3 <sup>rd</sup> trimester                                   | 1272 (59.7) | 469 (44.1) | 0.41 (0.32-0.52) | 0.30 (0.20-0.45) |                                                      |             |                  |                  |
| Breastfeeding                                               |             |            |                  |                  |                                                      |             |                  |                  |
| No                                                          | NA          |            |                  |                  | 16 (4.7)                                             | 120 (9.1)   | Ref              | Ref              |
| Yes                                                         | NA          |            |                  |                  | 327 (95.3)                                           | 1196 (90.9) | 0.49 (0.28-0.81) | 0.28 (0.09-0.81) |
| BELIEFS ON COVID-19 AND VACCINES (AGAINST FLU AND COVID-19) |             |            |                  |                  |                                                      |             |                  |                  |
| Belief that COVID-19 is more severe during pregnancy        |             |            |                  |                  | Belief that COVID-19 is riskier during breastfeeding |             |                  |                  |



|                                                                                                                      |             |             |                         |                         |                                                                             |             |                         |                          |
|----------------------------------------------------------------------------------------------------------------------|-------------|-------------|-------------------------|-------------------------|-----------------------------------------------------------------------------|-------------|-------------------------|--------------------------|
| No                                                                                                                   | 638 (29.9)  | 142 (13.4)  | <b>Ref</b>              | <b>Ref</b>              | 268 (78.1)                                                                  | 1072 (81.5) | Ref                     | ⊥                        |
| Yes                                                                                                                  | 1493 (70.1) | 921 (86.6)  | <b>2.77 (2.28-3.39)</b> | <b>1.65 (1.20-2.29)</b> | 75 (21.9)                                                                   | 244 (18.5)  | 0.81 (0.61-1.09)        | ⊥                        |
| <b>Had flu vaccine last winter</b>                                                                                   |             |             |                         |                         |                                                                             |             |                         |                          |
| No                                                                                                                   | 1511 (70.9) | 557 (52.4)  | <b>Ref</b>              | <b>Ref</b>              | 205 (59.8)                                                                  | 394 (29.9)  | Ref                     | Ref                      |
| Yes                                                                                                                  | 620 (29.1)  | 506 (47.6)  | <b>2.21 (1.90-2.58)</b> | <b>1.43 (1.05-1.95)</b> | 138 (40.2)                                                                  | 922 (70.1)  | <b>3.48 (2.72-4.45)</b> | <b>3.25 (1.93-5.52)</b>  |
| <b>Effectiveness of COVID vaccine for mother and unborn child</b>                                                    |             |             |                         |                         | <b>Effectiveness of COVID vaccine to protect mother and breastfed child</b> |             |                         |                          |
| Not very + not at all effective                                                                                      | 458 (21.5)  | 17 (1.6)    | <b>Ref</b>              | <b>Ref</b>              | 128 (37.3)                                                                  | 31 (2.4)    | <b>Ref</b>              | Ref                      |
| Extremely + very effective + effective                                                                               | 1673 (78.5) | 1046 (98.4) | <b>16.9 (10.7-28.6)</b> | <b>2.39 (1.15-5.27)</b> | 215 (62.7)                                                                  | 1285 (97.6) | <b>24.7 (16.4-38.1)</b> | 2.49 (0.84-7.64)         |
| <b>Safety of COVID vaccine for mother and unborn child</b>                                                           |             |             |                         |                         | <b>Safety of COVID vaccine for mother and child while breastfeeding</b>     |             |                         |                          |
| Not very + not at all safe                                                                                           | 1125 (52.8) | 62 (5.8)    | <b>Ref</b>              | <b>Ref</b>              | 219 (63.8)                                                                  | 38 (2.9)    | <b>Ref</b>              | <b>Ref</b>               |
| Extremely + very + safe                                                                                              | 1006 (47.2) | 1001 (94.2) | <b>18.1 (13.9-23.9)</b> | <b>36.5 (21.9-63.8)</b> | 124 (36.2)                                                                  | 1278 (97.1) | <b>62.7 (41.9-96.7)</b> | <b>72.4 (35.4-161.2)</b> |
| <b>TRUST IN THE FOLLOWING SOURCES TO PROVIDE RELIABLE INFORMATION REGARDING THE CORONAVIRUS</b>                      |             |             |                         |                         |                                                                             |             |                         |                          |
| <b>Great or absolute trust in public authorities (government and health authorities)</b>                             |             |             |                         |                         |                                                                             |             |                         |                          |
| No                                                                                                                   | 754 (35.7)  | 465 (44.8)  | <b>Ref</b>              | Ref                     | 200 (60.6)                                                                  | 464 (36.0)  | <b>Ref</b>              | Ref                      |
| Yes                                                                                                                  | 1359 (64.3) | 574 (55.2)  | <b>0.68 (0.59-0.80)</b> | 0.75 (0.54-1.05)        | 130 (39.4)                                                                  | 824 (64.0)  | <b>2.73 (2.13-3.51)</b> | 1.12 (0.61-1.99)         |
| <b>Great or absolute trust in healthcare providers (general practitioner, obstetrician, midwife, and pharmacist)</b> |             |             |                         |                         |                                                                             |             |                         |                          |
| No                                                                                                                   | 1124 (53.2) | 528 (50.8)  | Ref                     | ⊥                       | 220 (66.7)                                                                  | 636 (49.4)  | <b>Ref</b>              | Ref                      |
| Yes                                                                                                                  | 989 (46.8)  | 511 (49.2)  | 1.10 (0.95-1.28)        | ⊥                       | 110 (33.3)                                                                  | 652 (50.6)  | <b>2.05 (1.59-2.65)</b> | 0.69 (0.40-1.15)         |
| <b>Great or absolute trust in non-professional sources of information</b>                                            |             |             |                         |                         |                                                                             |             |                         |                          |

|                                                                                                                                                                        |             |             |                         |                         |            |             |                         |                  |
|------------------------------------------------------------------------------------------------------------------------------------------------------------------------|-------------|-------------|-------------------------|-------------------------|------------|-------------|-------------------------|------------------|
| No                                                                                                                                                                     | 2071 (98.0) | 1018 (98.0) | Ref                     | ⊥                       | 324 (98.2) | 1259 (97.7) | Ref                     | ⊥                |
| Yes                                                                                                                                                                    | 42 (2.0)    | 21 (2.0)    | 1.02 (0.59-1.71)        | ⊥                       | 6 (1.8)    | 29 (2.3)    | 1.24 (0.55-3.34)        | ⊥                |
| <b>History of a family member who refused COVID-19 vaccination</b>                                                                                                     |             |             |                         |                         |            |             |                         |                  |
| No                                                                                                                                                                     | 1693 (79.4) | 845 (79.5)  | Ref                     | ⊥                       | 210 (61.2) | 1049 (79.7) | Ref                     | Ref              |
| Yes                                                                                                                                                                    | 438 (20.6)  | 218 (20.5)  | 1.00 (0.83-1.20)        | ⊥                       | 133 (38.8) | 267 (20.3)  | <b>0.40 (0.31-0.52)</b> | 0.68 (0.40-1.19) |
| <b>Belief that restrictive measures are very / extremely useful to prevent the pandemic (disinfectant, mask, social distance, working from home, curfew, lockdown)</b> |             |             |                         |                         |            |             |                         |                  |
| No                                                                                                                                                                     | 167 (7.8)   | 175 (16.5)  | Ref                     | Ref                     | 79 (23.0)  | 149 (11.3)  | Ref                     | Ref              |
| Yes                                                                                                                                                                    | 1964 (92.2) | 21 (83.5)   | <b>0.43 (0.34-0.54)</b> | 1.09 (0.60-1.95)        | 264 (77.0) | 1167 (88.7) | <b>2.24 (1.72-3.17)</b> | 0.94 (0.39-2.24) |
| <b>Belief that vaccination is very / extremely useful to prevent the pandemic</b>                                                                                      |             |             |                         |                         |            |             |                         |                  |
| No                                                                                                                                                                     | 652 (30.6)  | 220 (20.7)  | Ref                     | Ref                     | 219 (63.8) | 245 (18.6)  | Ref                     | Ref              |
| Yes                                                                                                                                                                    | 1479 (69.4) | 843 (79.3)  | <b>1.69 (1.42-2.01)</b> | <b>1.79 (1.22-2.66)</b> | 124 (36.2) | 1071 (81.4) | <b>7.72 (5.96-10.0)</b> | 1.82 (0.95-3.41) |

ICU: Intensive Care Unit; NA = question was not applicable; OR = crude odds ratio

The bold numbers indicate ORs not including 1.

⊥ As these variables were not significantly associated with vaccine willingness in the univariate analyses, they were not included in the multivariable models.

aOR<sub>1</sub> = adjusted odds ratio, adjusted for country, working in healthcare, highest education level, positive COVID test in the family, chronic illness, trimester of pregnancy, history of flu vaccine the previous winter, belief that the COVID vaccine is effective, belief that the COVID vaccine is safe during pregnancy, trust in public authorities, belief that restrictive measures are useful, and belief that vaccination is useful

aOR<sub>2</sub> = adjusted for country, working in healthcare, history of positive SARS-CoV-2 test, chronic illness, breastfeeding, history of flu vaccine the previous winter, belief that the COVID vaccine is effective, belief that the COVID vaccine is safe during breastfeeding, trust in public authorities, trust in healthcare providers, belief that restrictive measures are useful, and belief that vaccination is useful.

\* The variable "History of COVID-19 with hospitalization in ICU in household or close family" was not added in model 1 because of collinearity with the variable "History of positive COVID test in household or close family". Among both, the variable "History of positive COVID test in household or close family" was not chosen to be included in model 1 because there were 3044 observations deleted because of missingness with the variable "History of COVID-19 with hospitalization in ICU in household or close family".

**Supplementary Table 3:** Association between socio-demographic, medical, obstetrical and ideological characteristics, and COVID-19 vaccine willingness, whatever the vaccination status, among pregnant women

| Pregnant women<br>N=2710                                     | Not willing to get<br>vaccinated<br>N=1552 | Do not<br>know<br>N=658 | Willing to get<br>vaccinated<br>N=500 | p-<br>value |
|--------------------------------------------------------------|--------------------------------------------|-------------------------|---------------------------------------|-------------|
| Determinants                                                 | N (%)                                      | N (%)                   | N (%)                                 |             |
| SOCIO-DEMOGRAPHIC CHARACTERISTICS                            |                                            |                         |                                       |             |
| Country                                                      |                                            |                         |                                       |             |
| Belgium                                                      | 42 (2.7)                                   | 16 (2.4)                | 24 (4.8)                              | 0.04        |
| Norway                                                       | 1357 (87.4)                                | 588<br>(89.4)           | 431 (86.2)                            | Ref         |
| Switzerland                                                  | 82 (5.3)                                   | 30 (4.6)                | 16 (3.2)                              | 0.20        |
| The Netherlands                                              | 36 (2.3)                                   | 18 (1.5)                | 18 (3.6)                              | 0.30        |
| United Kingdom                                               | 35 (2.3)                                   | 11 (2.1)                | 11 (2.2)                              | 0.64        |
| Maternal age                                                 |                                            |                         |                                       |             |
| 18-35                                                        | 1324 (86.0)                                | 553<br>(84.8)           | 424 (85.3)                            | 0.74        |
| >35                                                          | 215 (14.0)                                 | 99 (15.2)               | 73 (14.7)                             |             |
| Relationship status                                          |                                            |                         |                                       |             |
| Partner                                                      | 1507 (97.9)                                | 640<br>(98.2)           | 489 (98.4)                            | 0.79        |
| No partner                                                   | 32 (2.1)                                   | 12 (1.8)                | 8 (1.6)                               |             |
| Professional status                                          |                                            |                         |                                       |             |
| Inactive                                                     | 204 (13.3)                                 | 61 (9.4)                | 56 (11.3)                             | 0.03        |
| Active                                                       | 1333 (86.7)                                | 591<br>(90.6)           | 441 (88.7)                            |             |
| Working in healthcare                                        |                                            |                         |                                       |             |
| No                                                           | 879 (66.4)                                 | 432<br>(73.5)           | 297 (67.7)                            | 0.009       |
| Yes                                                          | 444 (33.6)                                 | 156<br>(26.5)           | 142 (32.3)                            |             |
| Educational level                                            |                                            |                         |                                       |             |
| Low                                                          | 47 (3.1)                                   | 16 (2.5)                | 7 (1.4)                               | Ref         |
| Medium                                                       | 321 (21.0)                                 | 96 (14.8)               | 73 (14.7)                             | 0.50        |
| High                                                         | 1158 (75.9)                                | 535<br>(82.7)           | 417 (83.9)                            | 0.07        |
| PERSONAL AND FAMILY HISTORY OF COVID-19                      |                                            |                         |                                       |             |
| History of personal positive SARS-CoV-2 test                 |                                            |                         |                                       |             |
| No                                                           | 1486 (95.7)                                | 635<br>(96.5)           | 484 (96.8)                            | 0.49        |
| Yes                                                          | 66 (4.3)                                   | 23 (3.5)                | 16 (3.2)                              |             |
| History of personal COVID infection (suspected or confirmed) |                                            |                         |                                       |             |

|                                                                  |             |               |            |                    |
|------------------------------------------------------------------|-------------|---------------|------------|--------------------|
| No                                                               | 1390 (89.6) | 597<br>(90.7) | 462 (92.4) | 0.16               |
| Yes                                                              | 162 (10.4)  | 61 (9.3)      | 38 (7.6)   |                    |
| History of positive SARS-CoV-2 test in household or close family |             |               |            |                    |
| No                                                               | 1355 (87.3) | 581<br>(88.3) | 440 (88.0) | 0.79               |
| Yes                                                              | 197 (12.7)  | 77 (11.7)     | 60 (12.0)  |                    |
| MEDICAL AND OBSTETRICAL CHARACTERISTICS                          |             |               |            |                    |
| Smoking during pregnancy                                         |             |               |            |                    |
| No                                                               | 1517 (98.6) | 648<br>(99.4) | 487 (98.0) | 0.11               |
| Yes                                                              | 22 (1.4)    | 20 (0.6)      | 10 (2.0)   |                    |
| Chronic illness requiring medication                             |             |               |            |                    |
| No                                                               | 665 (55.3)  | 278<br>(53.1) | 202 (47.1) | 0.01               |
| Yes                                                              | 537 (44.7)  | 246<br>(46.9) | 227 (52.9) |                    |
| Gravidity                                                        |             |               |            |                    |
| Multigravida                                                     | 760 (49.0)  | 323<br>(49.1) | 350 (46.8) | 0.67               |
| Primigravida                                                     | 792 (51.0)  | 335<br>(50.9) | 286 (53.2) |                    |
| Trimester of pregnancy                                           |             |               |            |                    |
| 1 <sup>st</sup> trimester                                        | 105 (6.8)   | 116<br>(17.6) | 67 (13.4)  | Ref                |
| 2 <sup>nd</sup> trimester                                        | 488 (31.4)  | 226<br>(34.3) | 207 (41.4) | 10 <sup>-7</sup>   |
| 3 <sup>rd</sup> trimester                                        | 959 (61.8)  | 316<br>(48.0) | 226 (45.2) | 10 <sup>-17</sup>  |
| BELIEFS ON VACCINES (AGAINST FLU AND COVID-19)                   |             |               |            |                    |
| Had flu vaccine last winter                                      |             |               |            |                    |
| No                                                               | 1082 (69.7) | 458<br>(69.6) | 297 (59.4) | 5.10 <sup>-5</sup> |
| Yes                                                              | 470 (30.3)  | 200<br>(30.4) | 203 (40.6) |                    |
| Effectiveness of COVID vaccine for mother and unborn child       |             |               |            |                    |
| Not very + not at all effective                                  | 420 (27.1)  | 40 (6.1)      | 5 (1.0)    | <10 <sup>-16</sup> |
| Extremely + very effective + effective                           | 1132 (72.9) | 618<br>(93.9) | 495 (99.0) |                    |
| Safety of COVID vaccine for mother and unborn child              |             |               |            |                    |
| Not very + not at all safe                                       | 961 (61.9)  | 180<br>(27.4) | 15 (3.0)   |                    |

|                                                                                                                                                                        |             |               |            |             |
|------------------------------------------------------------------------------------------------------------------------------------------------------------------------|-------------|---------------|------------|-------------|
| Extremely + very + safe                                                                                                                                                | 591 (38.1)  | 478<br>(72.6) | 485 (97.0) | $<10^{-16}$ |
| <b>TRUST IN THE FOLLOWING SOURCES TO PROVIDE RELIABLE INFORMATION REGARDING THE CORONAVIRUS</b>                                                                        |             |               |            |             |
| <b>Great or absolute trust in public authorities (government and health authorities)</b>                                                                               |             |               |            |             |
| No                                                                                                                                                                     | 581 (37.8)  | 195<br>(29.9) | 130 (26.1) |             |
| Yes                                                                                                                                                                    | 958 (62.2)  | 458<br>(70.1) | 368 (73.9) | $7.10^{-7}$ |
| <b>Great or absolute trust in healthcare providers (general practitioner, obstetrician, midwife, and pharmacist)</b>                                                   |             |               |            |             |
| No                                                                                                                                                                     | 835 (54.3)  | 326<br>(49.9) | 251 (50.4) |             |
| Yes                                                                                                                                                                    | 704 (45.7)  | 327<br>(50.1) | 247 (49.6) | 0.10        |
| <b>Great or absolute trust in non-professional sources of information</b>                                                                                              |             |               |            |             |
| No                                                                                                                                                                     | 1505 (97.8) | 642<br>(98.3) | 485 (97.4) |             |
| Yes                                                                                                                                                                    | 34 (2.2)    | 11 (1.7)      | 13 (2.6)   | 0.55        |
| <b>History of a family member who refused COVID-19 vaccination</b>                                                                                                     |             |               |            |             |
| No                                                                                                                                                                     | 1210 (78.0) | 546<br>(83.0) | 412 (82.4) |             |
| Yes                                                                                                                                                                    | 342 (22.0)  | 112<br>(17.0) | 88 (17.6)  | 0.009       |
| <b>Belief that restrictive measures are very / extremely useful to prevent the pandemic (disinfectant, mask, social distance, working from home, curfew, lockdown)</b> |             |               |            |             |
| No                                                                                                                                                                     | 137 (8.8)   | 31 (4.7)      | 28 (5.6)   |             |
| Yes                                                                                                                                                                    | 1415 (91.2) | 627<br>(95.3) | 472 (94.4) | 0.0009      |
| <b>Belief that vaccination is very / extremely useful to prevent the pandemic</b>                                                                                      |             |               |            |             |
| No                                                                                                                                                                     | 514 (33.1)  | 153<br>(23.3) | 61 (12.2)  |             |
| Yes                                                                                                                                                                    | 1038 (66.9) | 505<br>(76.7) | 439 (87.8) | $<10^{-16}$ |

This table displays the first sensitivity analysis with three levels in the outcome variable.

ICU: Intensive Care Unit; NA = question was not applicable; OR = crude odds ratio

The percentages are displayed in columns. Chi<sup>2</sup> tests were performed by row to assess whether there was an association between socio-demographic, medical and obstetrical characteristics of the participants and the three levels of response regarding their willingness to be vaccinated against COVID-19: “not willing to get vaccinated”, “I don’t know” and “willing to get vaccinated”.

**Supplementary Table S4:** Association between socio-demographic, history of COVID-19, medical and obstetrical characteristics, and COVID-19 vaccination or willingness to get vaccinated restricted to breastfeeding women in the postpartum women group

|                                                                         | <b>Breastfeeding women with available vaccination status<br/>N=1523</b> |                                                            |                         |                         |
|-------------------------------------------------------------------------|-------------------------------------------------------------------------|------------------------------------------------------------|-------------------------|-------------------------|
| <b>Determinants</b>                                                     | Not willing to<br>get<br>vaccinated<br><br>N (%)                        | Vaccinated or<br>willing to get<br>vaccinated<br><br>N (%) | <b>OR (95% CI)</b>      | <b>aOR (95% CI)</b>     |
| <b>Country</b>                                                          |                                                                         |                                                            |                         |                         |
| Belgium                                                                 | 23 (7.0)                                                                | 139 (11.6)                                                 | 1.46 (0.93-2.38)        | <b>3.07 (1.10-9.98)</b> |
| Norway                                                                  | 207 (63.3)                                                              | 858 (71.7)                                                 | Ref                     | <b>Ref</b>              |
| Switzerland                                                             | 55 (16.8)                                                               | 61 (5.1)                                                   | <b>0.27 (0.18-0.40)</b> | 0.78 (0.33-1.97)        |
| Netherlands                                                             | 33 (10.1)                                                               | 83 (6.9)                                                   | <b>0.61 (0.40-0.94)</b> | <b>6.11 (2.04-20.1)</b> |
| United Kingdom                                                          | 9 (2.8)                                                                 | 55 (4.6)                                                   | 1.47 (0.75-3.24)        | 2.15 (0.53-10.36)       |
| <b>Maternal age</b>                                                     |                                                                         |                                                            |                         |                         |
| 18-35                                                                   | 265 (83.9)                                                              | 986 (83.8)                                                 | Ref                     | ⊥                       |
| >35                                                                     | 51 (16.1)                                                               | 190 (16.2)                                                 | 1.00 (0.72-1.41)        | ⊥                       |
| <b>Professional status</b>                                              |                                                                         |                                                            |                         |                         |
| Inactive                                                                | 267 (84.8)                                                              | 1057 (90.4)                                                | Ref                     | Ref                     |
| Active                                                                  | 48 (15.2)                                                               | 112 (9.6)                                                  | <b>1.70 (1.17-2.43)</b> | ***                     |
| <b>Working in healthcare</b>                                            |                                                                         |                                                            |                         |                         |
| No                                                                      | 191 (71.8)                                                              | 690 (65.0)                                                 | Ref                     | Ref                     |
| Yes                                                                     | 75 (28.2)                                                               | 371 (35.0)                                                 | <b>1.37 (1.02-1.85)</b> | 1.07 (0.62-1.88)        |
| <b>Employment at risk of contracting COVID-19</b>                       |                                                                         |                                                            |                         |                         |
| No                                                                      | 54 (52.4)                                                               | 141 (43.5)                                                 | Ref                     | ⊥                       |
| Yes                                                                     | 49 (47.6)                                                               | 183 (56.5)                                                 | 1.43 (0.92-2.24)        | ⊥                       |
| <b>Educational level</b>                                                |                                                                         |                                                            |                         |                         |
| Low                                                                     | 10 (3.2)                                                                | 20 (1.7)                                                   | <b>Ref</b>              | Ref                     |
| Medium                                                                  | 87 (27.9)                                                               | 164 (14.0)                                                 | 0.94 (0.41-2.06)        | 4.19 (0.43-46.6)        |
| High                                                                    | 215 (68.9)                                                              | 986 (84.3)                                                 | <b>2.29 (1.02-4.86)</b> | 7.00 (0.76-74.4)        |
| <b>PERSONAL AND FAMILY HISTORY OF COVID-19</b>                          |                                                                         |                                                            |                         |                         |
| <b>History of personal positive SARS-CoV-2 test</b>                     |                                                                         |                                                            |                         |                         |
| No                                                                      | 303 (92.7)                                                              | 1145 (95.7)                                                | Ref                     | Ref                     |
| Yes                                                                     | 24 (7.3)                                                                | 51 (4.3)                                                   | <b>0.56 (0.34-0.94)</b> | 0.56 (0.20-1.77)        |
| <b>History of personal COVID infection (suspected or confirmed)</b>     |                                                                         |                                                            |                         |                         |
| No                                                                      | 258 (82.7)                                                              | 1023 (86.8)                                                | Ref                     | ⊥                       |
| Yes                                                                     | 54 (17.3)                                                               | 155 (13.2)                                                 | 0.72 (0.52-1.02)        | ⊥                       |
| <b>History of personal COVID infection with hospitalization in ICU</b>  |                                                                         |                                                            |                         |                         |
| No                                                                      | 54 (98.2)                                                               | 61 (100)                                                   | Ref                     | ⊥                       |
| Yes                                                                     | 1 (1.8)                                                                 | 0 (0)                                                      | *                       | ⊥                       |
| <b>History of positive SARS-CoV-2 test in household or close family</b> |                                                                         |                                                            |                         |                         |
| No                                                                      | 260 (79.5)                                                              | 982 (82.1)                                                 | Ref                     | ⊥                       |

|                                                                                                      |            |             |                  |                  |
|------------------------------------------------------------------------------------------------------|------------|-------------|------------------|------------------|
| Yes                                                                                                  | 67 (20.5)  | 214 (17.9)  | 0.85 (0.63-1.55) | ⊥                |
| <b>History of COVID-19 with hospitalization in ICU in household or close family</b>                  |            |             |                  |                  |
| No                                                                                                   | 55 (96.5)  | 61 (87.1)   | Ref              | ⊥                |
| Yes                                                                                                  | 2 (3.5)    | 9 (12.9)    | 4.06 (0.99-27.4) | ⊥                |
| <b>MEDICAL CHARACTERISTICS</b>                                                                       |            |             |                  |                  |
| <b>Allergy</b>                                                                                       |            |             |                  |                  |
| No                                                                                                   | 158 (82.3) | 565 (76.4)  | Ref              | ⊥                |
| Yes                                                                                                  | 34 (17.7)  | 175 (23.6)  | 1.44 (0.97-2.19) | ⊥                |
| <b>Chronic illness requiring medication</b>                                                          |            |             |                  |                  |
| No                                                                                                   | 158 (80.2) | 565 (70.8)  | Ref              | Ref              |
| Yes                                                                                                  | 39 (19.8)  | 233 (29.2)  | 1.67 (1.15-2.48) | 2.14 (1.15-4.18) |
| <b>BELIEFS ON VACCINES (AGAINST FLU AND COVID-19)</b>                                                |            |             |                  |                  |
| <b>Belief that COVID is risky during breastfeeding</b>                                               |            |             |                  |                  |
| No                                                                                                   | 260 (79.5) | 982 (82.1)  | Ref              | ⊥                |
| Yes                                                                                                  | 67 (20.5)  | 214 (17.9)  | 0.85 (0.62-1.15) | ⊥                |
| <b>Had flu vaccine last winter</b>                                                                   |            |             |                  |                  |
| No                                                                                                   | 194 (59.3) | 365 (30.5)  | Ref              | Ref              |
| Yes                                                                                                  | 133 (40.7) | 831 (69.5)  | 3.32 (2.58-4.28) | 3.19 (1.86-5.52) |
| <b>Effectiveness of COVID vaccine to protect mother and breastfed child</b>                          |            |             |                  |                  |
| Not very + not at all effective                                                                      | 118 (36.1) | 28 (2.3)    | Ref              | Ref              |
| Extremely + very + effective                                                                         | 209 (63.9) | 1168 (97.7) | 23.6 (15.4-37.1) | 2.16 (0.69-7.09) |
| <b>Safety of COVID vaccine for mother and child while breastfeeding</b>                              |            |             |                  |                  |
| Not very + not at all safe                                                                           | 207 (63.3) | 32 (2.7)    | Ref              | Ref              |
| Extremely + very + safe                                                                              | 120 (36.7) | 1164 (97.3) | 62.7 (41.9-96.7) | 82.0 (38.1-194)  |
| <b>TRUST IN THE FOLLOWING SOURCES TO PROVIDE RELIABLE INFORMATION REGARDING THE CORONAVIRUS</b>      |            |             |                  |                  |
| <b>Great or absolute trust in public authorities (government and health authorities)</b>             |            |             |                  |                  |
| No                                                                                                   | 187 (59.2) | 399 (33.9)  | Ref              | Ref              |
| Yes                                                                                                  | 129 (40.8) | 779 (66.1)  | 2.83 (2.19-3.66) | 1.02 (0.54-1.86) |
| <b>Great or absolute trust in healthcare providers (GP, obstetrician, midwife, pharmacist)</b>       |            |             |                  |                  |
| No                                                                                                   | 209 (66.1) | 577 (49.0)  | Ref              | Ref              |
| Yes                                                                                                  | 107 (33.9) | 601 (51.0)  | 2.03 (1.57-2.64) | 0.63 (0.36-1.07) |
| <b>Great or absolute trust in non-professional sources of information</b>                            |            |             |                  |                  |
| No                                                                                                   | 310 (98.1) | 1152 (97.8) | Ref              | ⊥                |
| Yes                                                                                                  | 6 (1.9)    | 26 (2.2)    | 1.17 (0.51-3.15) | ⊥                |
| <b>Family member refused COVID vaccine</b>                                                           |            |             |                  |                  |
| No                                                                                                   | 206 (63.0) | 956 (79.9)  | Ref              | Ref              |
| Yes                                                                                                  | 121 (37.0) | 240 (20.1)  | 0.43 (0.33-0.56) | 0.75 (0.43-1.35) |
| <b>Family member decision to refuse a COVID vaccine contributed to the perception of vaccination</b> |            |             |                  |                  |
| No                                                                                                   | 106 (87.6) | 221 (92.1)  | Ref              | ⊥                |

|                                                                                                                                                                        |            |             |                          |                  |
|------------------------------------------------------------------------------------------------------------------------------------------------------------------------|------------|-------------|--------------------------|------------------|
| Yes                                                                                                                                                                    | 15 (12.4)  | 19 (7.9)    | 0.61 (0.30-1.26)         | ⊥                |
| <b>Belief that restrictive measures are very / extremely useful to prevent the pandemic (disinfectant, mask, social distance, working from home, curfew, lockdown)</b> |            |             |                          |                  |
| No                                                                                                                                                                     | 70 (21.4)  | 119 (9.9)   | Ref                      | Ref              |
| Yes                                                                                                                                                                    | 257 (78.6) | 1077 (90.1) | <b>2.47 (1.78-3.40)</b>  | 0.69 (0.26-1.80) |
| <b>Belief that vaccination is very / extremely useful to prevent the pandemic</b>                                                                                      |            |             |                          |                  |
| No                                                                                                                                                                     | 205 (62.7) | 204 (17.1)  | Ref                      | Ref              |
| Yes                                                                                                                                                                    | 122 (37.3) | 992 (82.9)  | <b>8.17 (6.25-10.73)</b> | 1.78 (0.90-3.44) |

This table displays the second sensitivity analysis.

ICU: Intensive Care Unit; NA = question was not applicable; OR = crude odds ratio

The bold numbers indicate ORs not including 1.

aOR = adjusted odds ratio, adjusted for country, maternal age, professional status, working in healthcare, education level, personal history of positive COVID test, history of flu vaccine the previous winter, belief that the COVID vaccine is effective, belief that the COVID vaccine is safe during pregnancy, great or absolute trust in public authorities (government and health authorities), great or absolute trust in healthcare providers (GP, obstetrician, midwife, pharmacist family member who refused the COVID vaccine, **belief that restrictive measures are very / extremely useful to prevent the pandemic, belief that vaccination is very / extremely useful to prevent the pandemic.**

\* The model did not run because of the absence of event.

⊥ As these variables were not significantly associated with vaccine willingness in the univariate analyses, they were not included in the multivariable models.



**Supplementary Table S5:** Association between beliefs on the impact of COVID-19 infection and COVID-19 vaccine willingness among pregnant and postpartum women.

| Pregnant women                                                                                                                          | Not willing to get vaccinated<br>N=2131 |                  | Vaccinated or willing to get vaccinated<br>N=1063 |                  |
|-----------------------------------------------------------------------------------------------------------------------------------------|-----------------------------------------|------------------|---------------------------------------------------|------------------|
|                                                                                                                                         | n/N                                     | % (95% CI)       | n/N                                               | % (95% CI)       |
| <b>Belief that coronavirus infection can be more severe during pregnancy than among non-pregnant women of the same age</b>              | 1493/2131                               | 70.1 (68.1-72.0) | 921/1063                                          | 86.6 (84.4-88.6) |
| <b>Specification in case of positive response *</b>                                                                                     |                                         |                  |                                                   |                  |
| Higher risk of maternal complication                                                                                                    | 1196/1250                               | 95.7 (94.4-96.7) | 787/794                                           | 99.1 (98.1-99.6) |
| Higher risk of congenital malformation                                                                                                  | 150/239                                 | 62.8 (56.3-68.9) | 109/138                                           | 79.0 (71.2-85.5) |
| Impact on fetal growth and development                                                                                                  | 373/463                                 | 80.4 (76.5-83.9) | 257/296                                           | 86.8 (82.4-90.5) |
| Higher risk of pregnancy complication                                                                                                   | 854/904                                 | 94.5 (96.7-98.9) | 688/702                                           | 98.0 (96.7-98.9) |
| Mother-to-child transmission during delivery                                                                                            | 392/488                                 | 80.3 (76.5-83.7) | 273/313                                           | 87.2 (83.0-90.7) |
| Postpartum women                                                                                                                        | Not willing to get vaccinated<br>N=343  |                  | Vaccinated or willing to get vaccinated<br>N=1316 |                  |
|                                                                                                                                         | n/N                                     | % (95% CI)       | n/N                                               | % (95% CI)       |
| <b>Belief that breastfeeding may be risky to extremely risky to the infant if the breastfeeding mother is infected with coronavirus</b> | 217/343                                 | 63.3 (57.9-68.4) | 818/1316                                          | 62.2 (59.5-64.8) |
| <b>Specification in case of positive response *</b>                                                                                     |                                         |                  |                                                   |                  |
| Disease could stop the mother from breastfeeding (feeling too sick)                                                                     | 58/105                                  | 55.2 (45.2-65.0) | 120/189                                           | 63.5 (56.2-70.4) |
| Disease could negatively affect the milk production                                                                                     | 48/97                                   | 49.5 (39.2-59.8) | 96/172                                            | 55.8 (48.1-63.4) |
| Transmission of the virus to the baby through milk                                                                                      | 41/89                                   | 46.1 (35.4-57.0) | 73/147                                            | 49.7 (41.3-58.0) |
| Transmission of the virus to the baby while breastfeeding through close contact                                                         | 84/128                                  | 65.6 (56.7-73.8) | 221/285                                           | 77.5 (72.2-82.3) |

CI: confidence interval

\* Multiple answers possible

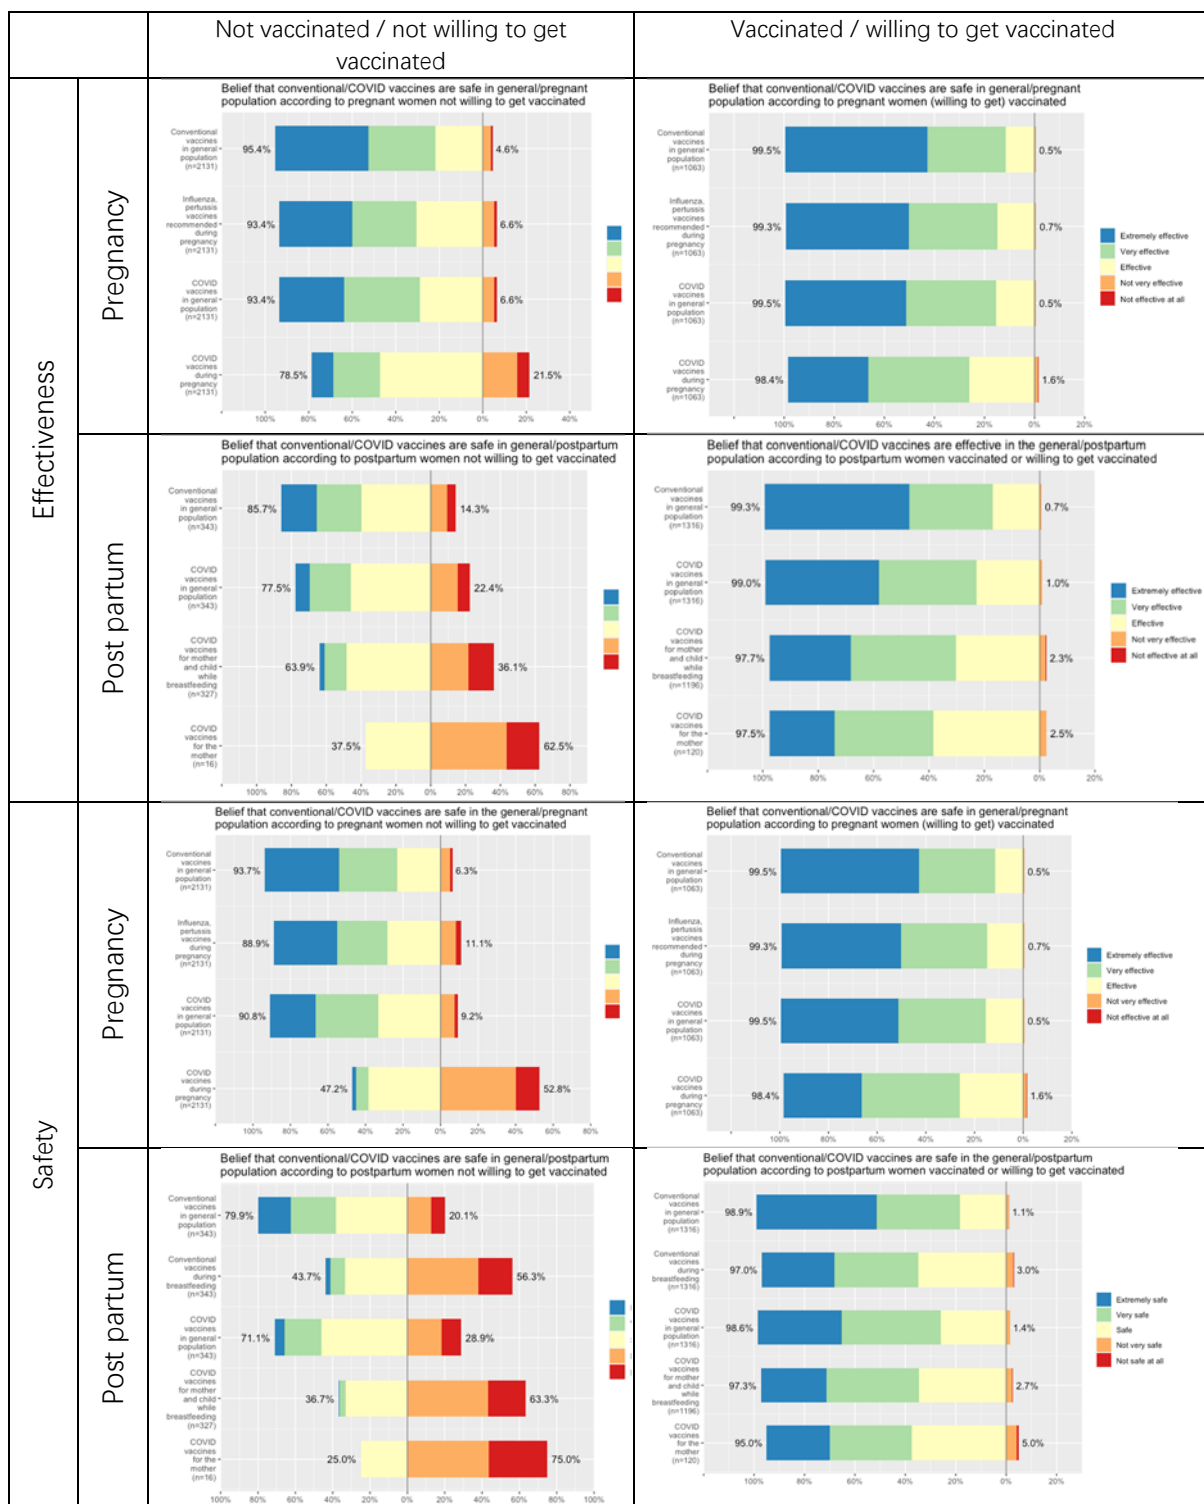

**Supplementary Figure S1:** Perception on the safety and effectiveness of conventional and COVID-19 vaccines among pregnant and postpartum women, vaccinated or willing to get vaccinated or not.

For postpartum women, the 2 last questions were mutually exclusive: breastfeeding mothers were asked for their perception on themselves and their child while breastfeeding; mothers feeding their child with formula were asked for their perception on themselves only (these 2 questions are merged in supplementary table S2).

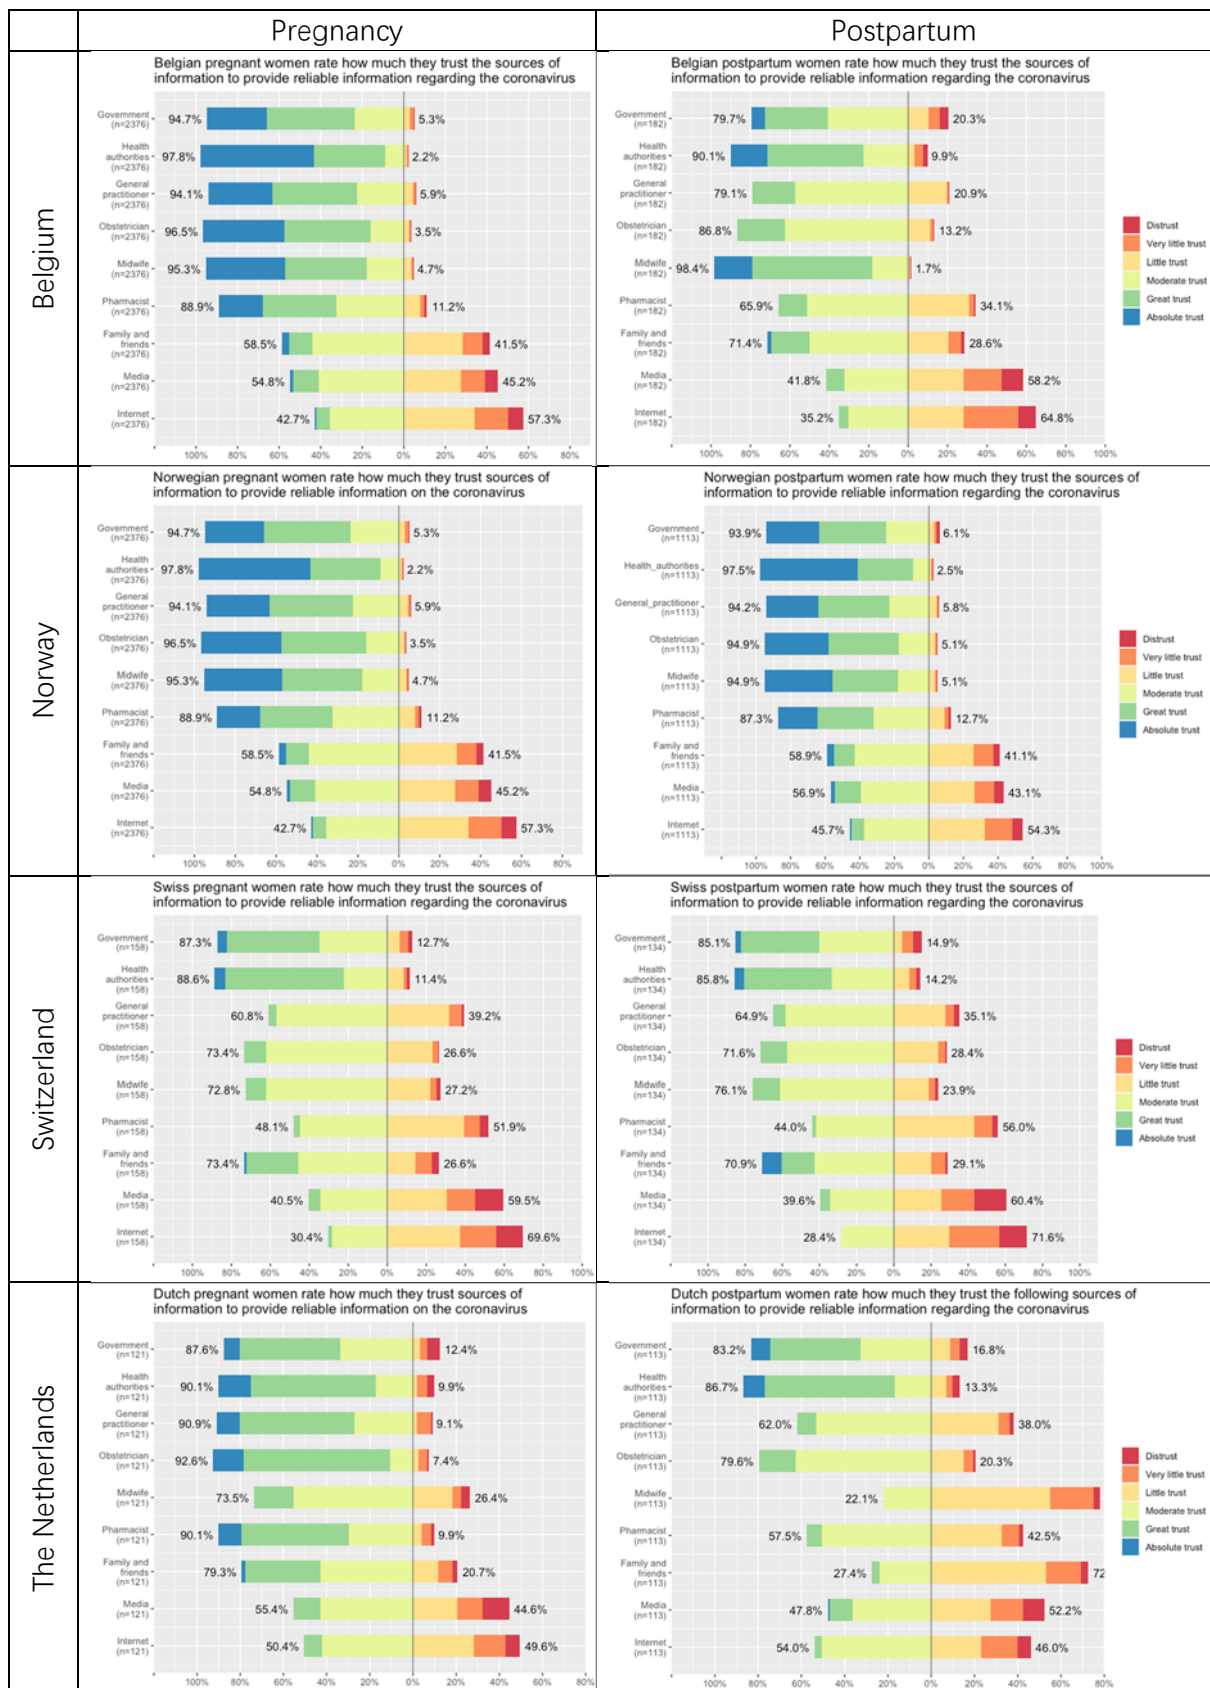

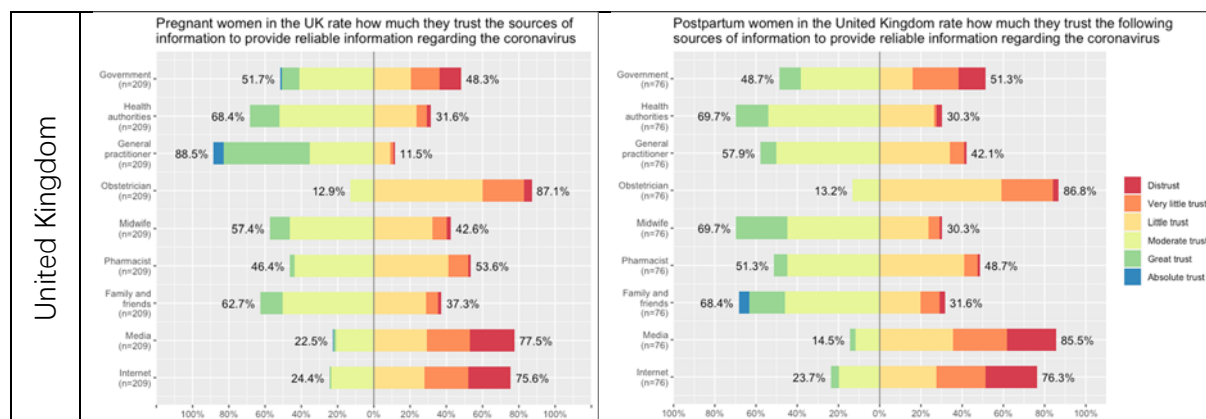

**Supplementary Figure S2:** Sources trusted to provide information regarding the coronavirus by obstetrical status and by country

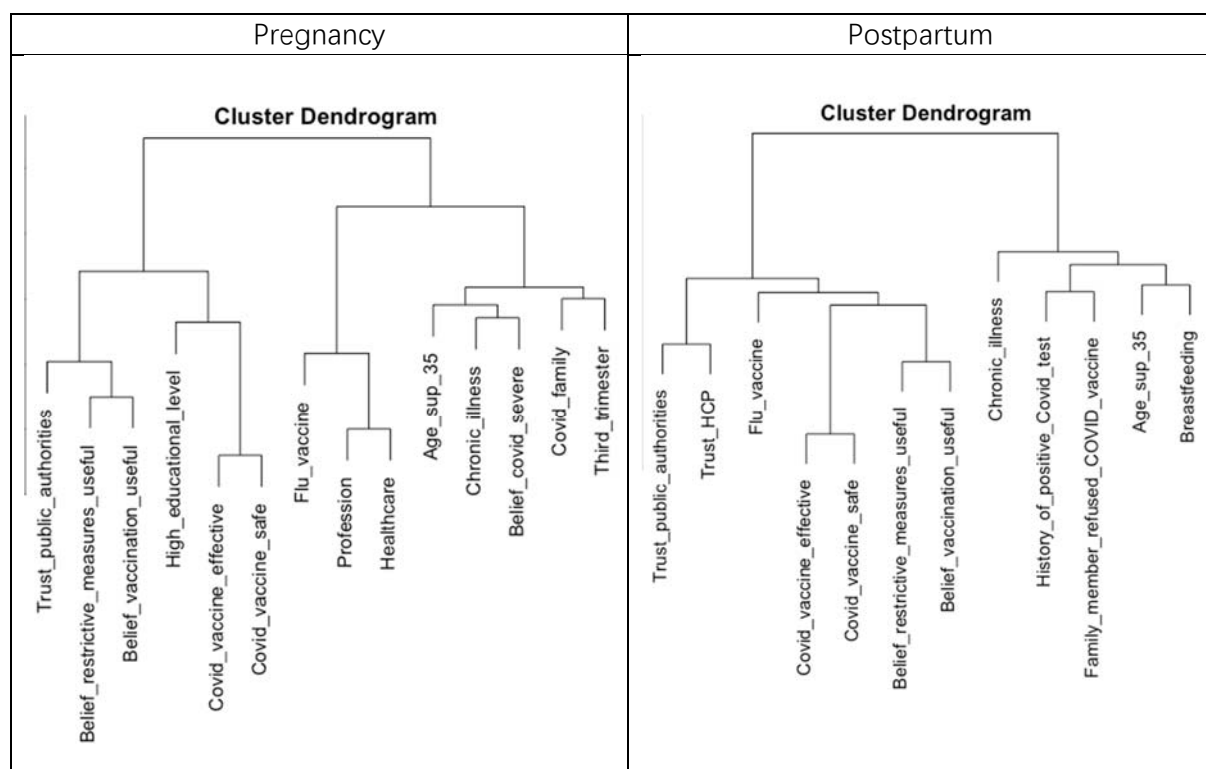

**Supplementary Figure S3:** Hierarchical cluster analysis of determinants associated with vaccination adherence among pregnant (S3a) and postpartum women (S3b)

Hierarchical clustering is an algorithm that attempts to group subjects with similar features into clusters. These two dendrograms show the hierarchical relationship between determinants of vaccination willingness among pregnant and postpartum women. Traditionally, these factors are considered as confounding factors and can be addressed by multivariable regression modeling (Supplementary table 2). (Zhang Z, Murtagh F, Van Poucke S, Lin S, Lan P. Hierarchical cluster analysis in clinical research with heterogeneous study population: highlighting its visualization with R. *Ann Transl Med* 2017;5(4):75. doi: 10.21037/atm.2017.02.05)

HCP: Health Care Providers
